# Supplementary material for: Domeless receptor loss in fat body tissue reverts insulin resistance induced by a high-sugar diet in Drosophila melanogaster
Source: PubMed Central journal article supplement (PMC7864986; doi:10.1038/s41598-021-82944-4), 2021-02-05
Supplement: 41598_2021_82944_MOESM1_ESM.pdf [file 41598_2021_82944_MOESM1_ESM.pdf]

## Domeless receptor loss in fat body tissue reverts insulin resistance induced by a high-sugar diet in *Drosophila melanogaster*.

Fernanda Lourido, Daniela Quenti, Daniela Salgado-Canales and Nicolás Tobar

### Supplementary Materials.

**Supplementary Table 1.** Nutrient content of control and high sugar foods. We use a formulation previously<sup>33</sup> a control diet and a high sugar diet that contains sucrose to replace glucose, based on Bloomington's semi-defined food.

| Control Diet                          | 100 ml |       | carbs (g) | protein (g) | fat (g) |       |
|---------------------------------------|--------|-------|-----------|-------------|---------|-------|
| Agar                                  | 1.0g   |       | 0.89      | 0           | 0.01    |       |
| Brewer's Yeast                        | 8.0g   |       | 3.2       | 3.6         | 0.08    |       |
| Yeast Extract                         | 2.0g   |       | 0.33      | 1.08        | 0       |       |
| Peptone                               | 2.0g   |       | 0.01      | 1.46        | 0       |       |
| Sucrose                               | 5.1g   |       | 5.1       | 0           | 0       |       |
| MgSO <sub>4</sub> x 6H <sub>2</sub> O | 0.05g  |       |           |             |         |       |
| CaCl <sub>2</sub> x 2H <sub>2</sub> O | 0.05g  |       |           |             |         |       |
| Propionic acid                        |        |       | 0.6g      |             |         |       |
| Mold inhibitor                        |        |       | 1.1g      |             |         |       |
| <b>Total kcal</b>                     |        |       |           |             |         |       |
| Carbs %                               |        | 63.9% |           |             |         |       |
| Protein %                             |        | 34.9% |           |             |         |       |
| Fat %                                 |        | 1.1%  |           |             |         |       |
| Total Grams                           |        |       | 11.23     | 6.14        | 0.09    |       |
| Total Kcal                            |        |       | 44.92     | 24.56       | 0.77    | 70.28 |

| High-Sugar Diet                       | 100 mL |       | carbs (g) | protein (g) | fat (g) |        |
|---------------------------------------|--------|-------|-----------|-------------|---------|--------|
| Agar                                  | 1.0g   |       | 0.89      | 0           | 0.01    |        |
| Brewer's Yeast                        | 8.0g   |       | 3.2       | 3.6         | 0.08    |        |
| Yeast Extract                         | 2.0g   |       | 0.33      | 1.08        | 0       |        |
| Peptone                               | 2.0g   |       | 0.01      | 1.46        | 0       |        |
| Sucrose                               | 34.2g  |       | 34.2      | 0           | 0       |        |
| MgSO <sub>4</sub> x 6H <sub>2</sub> O | 0.05g  |       |           |             |         |        |
| CaCl <sub>2</sub> x 2H <sub>2</sub> O | 0.05g  |       |           |             |         |        |
| Propionic acid                        |        |       | 0.6g      |             |         |        |
| Mold inhibitor                        |        |       | 1.1g      |             |         |        |
| <b>Total kcal</b>                     |        |       |           |             |         |        |
| Carbs %                               |        | 86.4% |           |             |         |        |
| Protein %                             |        | 13.2% |           |             |         |        |
| Fat %                                 |        | 0.4%  |           |             |         |        |
| Total Grams                           |        |       | 40.33     | 6.14        | 0.09    |        |
| Total Kcal                            |        |       | 161.32    | 24.57       | 0.77    | 186.66 |

**Supplementary Figure #1. Validation of Accu-chek Performa glucometer for determining glucose in the hemolymph.**

We verified that the glucometer linearly discriminates glucose levels as well as its specificity. The results obtained show that the determination of glucose levels using a standard glucometer does not differ significantly from those obtained with the colorimetric kit.

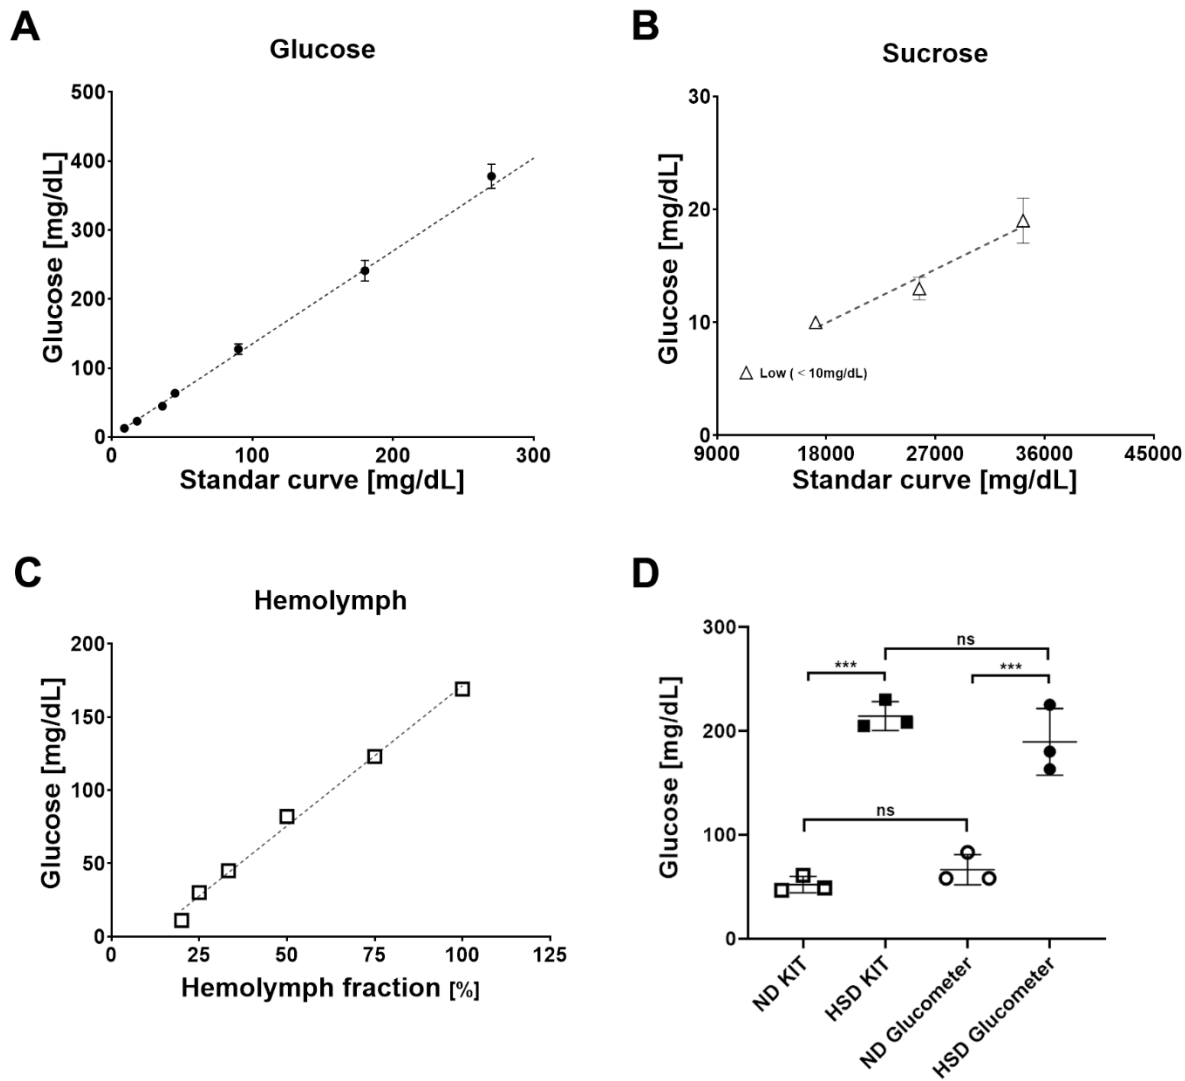

**Supplementary Figure 1.** The glucometer makes it possible to quantify glucose levels in the hemolymph. **A.** Glucose determination with a glucometer on a standard glucose curve (0.5 to 20 mM). **B.** Glucose determination with a glucometer, on a standard sucrose curve (0.05 to 1 M). **C.** Glucose determination with a glucometer, in a hemolymph dilution (10-100% in water) from larvae fed with HSD. **D.** comparison between glucose levels determined with a colorimetric kit (# GAHK20, Sigma-Aldrich, USA) and Accu-chek Performa glucometer in the same paired sample (hemolymph pool) from larvae fed with ND and HSD. The dotted line corresponds to the best linear fit of the points. (\*\*\*) represents a statistically significant difference. One-way ANOVA, Tukey's multiple comparisons test.

## Supplementary Figure #2

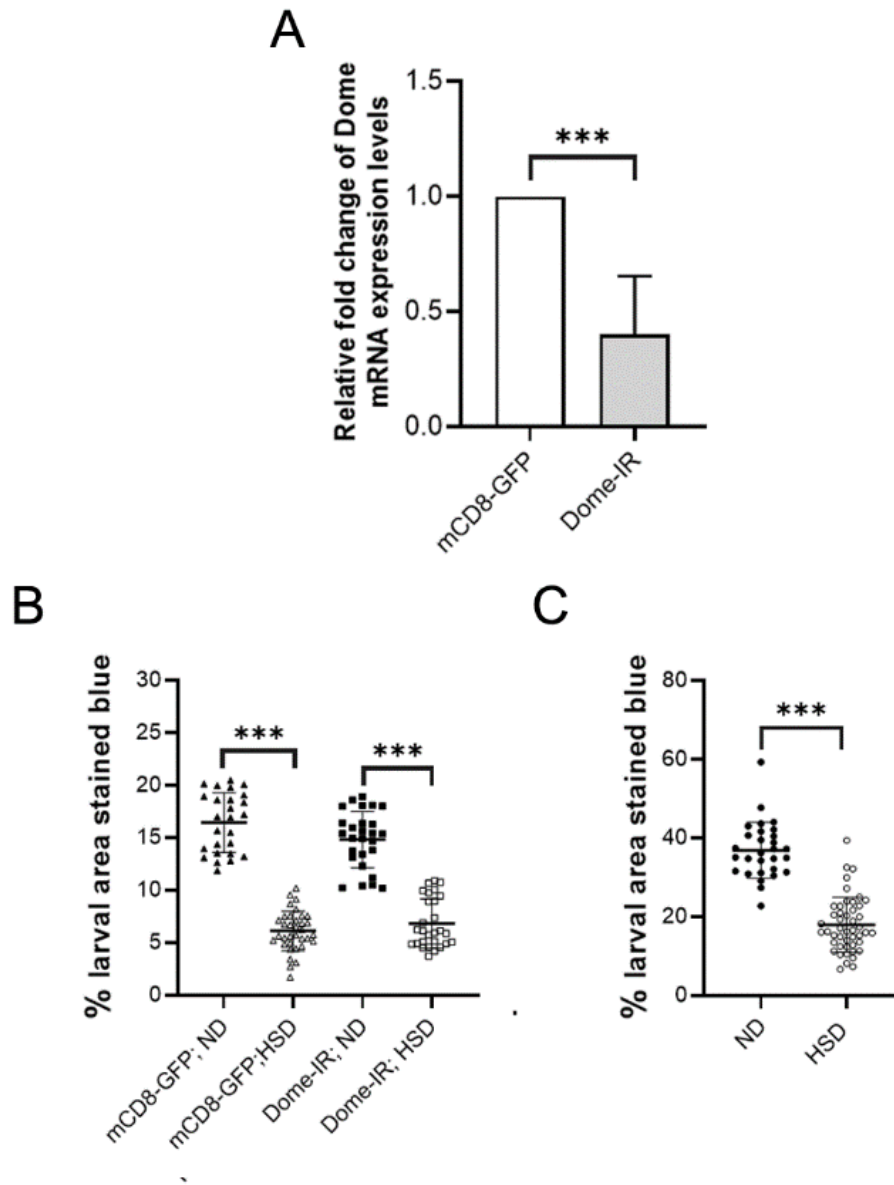

**Supplementary Figure 2. A.** Relative expression by qPCR to dome in fat body cells of mCD8-GFP and Dome-IR larvae fed with ND. ( $n = 25$  larvae per pool,  $N \geq 3$  independent experiments). Bars represent mean  $\pm$  SD. An unpaired two-tailed t-test has been used to derive P-value. \*\*\* $p < 0.001$ , \*\* $p < 0.01$ , \*  $p < 0.05$ . **B.** Percent of larval area stained with brilliant blue dye of mCD8-GFP and Dome-IR larvae fed with ND for 72 h and HSD for 120 h ( $n = 10$  larvae per pool,  $N = 3$ ). 2-way ANOVA followed by Bonferroni's multiple comparisons test was used to derive all P-values. \*\*\* $p < 0.001$ , \*\* $p < 0.01$ , \*  $p < 0.05$ . **C.** Percent of larval area stained with brilliant blue dye of Canton-S larvae fed with ND for 72 h and HSD for 120 h. ( $n = 10$  larvae per pool,  $N = 3$ ). An unpaired two-tailed t-test was used to derive P-value. \*\*\* $p < 0.001$ , \*\* $p < 0.01$ , \*  $p < 0.05$ .

**Supplementary Table # 2: Primer list used for qPCR.**

| <b>Gen</b>         | <b>Forward 5'→3'</b>    | <b>Reverse 5'→3'</b>     |
|--------------------|-------------------------|--------------------------|
| Dome*              | TCTGTCTGTGAACGCCACTC    | TATCGAACCCCTCGCATTCCG    |
| eGFP <sup>1</sup>  | AGATCCGCCACAACATCGAG    | TCGTTGGGGTCTTTGCTCAG     |
| NLaz*              | GGACAACCCTCGAATGTA ACT  | GACGGCGTATGACTCGTAATC    |
| TotA**             | TTCCGACGAAGATCGTGAGG    | CTGGGTGCTATTGATTTGGAGT   |
| Socs36e*           | CTGGGTGCTATTGATTTGGAGT  | CGAGGATGTGGATGTGGAC      |
| Ptp61F**           | AACGGCATCGATCCAATTC     | CCGCTTCAGCTCGTTCTC       |
| Upd2 <sup>2</sup>  | AGTGCGGTGAAGCTAAAGACTTG | GCCCGTCCCAGATATGAGAA     |
| Eiger*             | CAGTGCATCCTCAGCCTCAA    | GCAGGGCTCTCTTTGGAAGT     |
| Dilp2 <sup>3</sup> | CTCAATCCCCTGCAGTTTGT    | CGCAGAGCCTTCATATCACA     |
| Dilp6 <sup>4</sup> | CGATGTATTTCCCAACAGTTTCG | AAATCGGTTACGTTCTGCAAGTC  |
| AKHR**             | GCTATCCACGGACCTGATGTG   | CTGTCGAGCGATATGCAGACC    |
| FBP**              | CCGCCATCAAGGCTACATCAT   | TTGGAGAGCACGTCCAGTTTC    |
| PEPCK**            | TGATCCCGAACGCACCATC     | CTCAGGGCGAAGCACTTCTT     |
| BMM*               | CTGCTGTCTCCTCTGCGATT    | TGTAGACCCTCCAGCAGACA     |
| Lsd-1*             | TTGGTTTCGGCCCTGAATGA    | GGGAGAAGCGTTGACCATGA     |
| FASN*              | CCCGCTCCACTCCAAGA ACT   | TTCTGGGTGCTGGGTGAATG     |
| AKH*               | GGGAGAAGCGTTGACCATGA    | AGCAGCATTTCGTTGGAGGT     |
| Hex C**            | CAGGCCAACGTCAAGTGTTTT   | GTGGTGACCTTTCAGCGAGA     |
| GAPDH <sup>5</sup> | CATTGTGGGCTCCGGCAA      | CGCCCACGATTTTCGCTATG     |
| FOXO**             | CATGGGGAAATCTATCCTATGCG | ACTCAGTGTCAATCGTTTGTCG   |
| CPT*               | CGAGACCTTACCTTCGCTCC    | TGGA ACTCATCAATAGTCTTGCG |

\* Designed by NT's Lab

\*\* Validated in [https://www.flyrnai.org/cgi-bin/DRSC\\_primerbank.pl](https://www.flyrnai.org/cgi-bin/DRSC_primerbank.pl)

1 Tan MC, Wong WY, Ng WL, Yeo KS, Begam T, Mohidin M *et al.* Identification of 5-methoxy-2-(diformylmethylidene)-3,3-dimethylindole as an anti-influenza a virus agent. *PLoS One* 2017; **12**. doi:10.1371/journal.pone.0170352.

2 Wu M, Pastor-Pareja JC, Xu T. Interaction between RasV12 and scribbled clones induces tumour growth

and invasion. *Nature* 2010; **463**: 545–548.

- 3 Cong X, Wang H, Liu Z, He C, An C, Zhao Z. Regulation of sleep by insulin-like peptide system in *Drosophila melanogaster*. *Sleep* 2015; **38**: 1075-1083A.
- 4 Fedina TY, Arbuthnott D, Rundle HD, Promislow DEL, Pletcher SD. Tissue-specific insulin signaling mediates female sexual attractiveness. *PLoS Genet* 2017; **13**. doi:10.1371/journal.pgen.1006935.
- 5 Anding AL, Baehrecke EH. Vps15 is required for stress induced and developmentally triggered autophagy and salivary gland protein secretion in *Drosophila*. *Cell Death Differ* 2015; **22**: 457–464.
